# Supplementary material for: Stepwise synthesis of Zr-based metal–organic frameworks: incorporating a trinuclear zirconocene-based metallo-pyridine ligand
Source: Royal Society of Chemistry journal article supplement (doi:10.1039/d1ce01418h), 2021-12-02
Supplement: d1ce01418h1.pdf [file d1ce01418h1.pdf]

## Electronic Supplementary Information

### Stepwise synthesis of Zr-based metal-organic frameworks: Incorporating trinuclear zirconocene-based metallo-pyridine ligand

Juan Zhu<sup>a</sup>, Zhao-Yang Liu<sup>a</sup>, Shuang-bao Li<sup>\*b</sup>, He Huang<sup>a</sup>, Bao-Xu Jiang<sup>a</sup>,  
and Yu-Teng Zhang<sup>\*a</sup>

<sup>a</sup>College of Chemical Engineering, Northeast Electric Power University, Jilin City  
132012, PR China.

<sup>b</sup>School of Chemical and Pharmaceutical Engineering, Jilin Institute of Chemical  
Technology, Jilin, 132022, PR China.

\*Corresponding author.

E-mail address: zhangyuteng@neepu.edu.cn; lishb997@nenu.edu.cn

**Table S1.** Typical ZrMOF materials based on the stepwise synthesis.

#### 1. Materials and Methods

#### 2. Synthesis

**Table S2.** Crystal data and structure refinement for ZrMOF-Co and ZrMOF-Ni

**Figure S1.** Crystal structure of ZrMOF-Co/Ni

**Figure S2.** Trinuclear zirconocene-based metallo-pyridine building block

**Figure S3.** PXRD patterns for ZrMOF-Co

**Figure S4.** PXRD patterns for ZrMOF-Ni

**Figure S5.** IR spectra of ZrMOF-Co and ZrMOF-Ni

**Figure S6.** TGA curve of ZrMOF-Co

**Figure S7.** TGA curve of ZrMOF-Ni

**Figure S8.** XPS spectra of ZrMOF-Co

**Figure S9.** XPS spectra of ZrMOF-Ni

**Figure S10.** The inverse magnetic susceptibility  $\chi_M^{-1}$  for ZrMOF-Co

**Figure S11.** The inverse magnetic susceptibility  $\chi_M^{-1}$  for ZrMOF-Ni

**Table S1. Typical ZrMOF materials based on the stepwise synthesis.**

| ZrMOFs                      | Precursor                                                | Reactant (Metal)                                                             | Reactant (Ligand)             | Reactant (Others)                                                        | Year | Ref.      |
|-----------------------------|----------------------------------------------------------|------------------------------------------------------------------------------|-------------------------------|--------------------------------------------------------------------------|------|-----------|
| Zirconium muconate          | Zr <sub>6</sub> methacrylate cluster                     | /                                                                            | muconic acid                  | /                                                                        | 2010 | 1         |
| UiO-66 terephthalate        | Zr <sub>6</sub> cluster                                  | /                                                                            | terephthalic acid             | /                                                                        | 2010 | 1         |
| SALI-PPA                    | NU-1000                                                  | /                                                                            | /                             | PPA solutions                                                            | 2019 | 2         |
| PCN-160-CoCl <sub>2</sub>   | PCN-160-imine                                            | CoCl <sub>2</sub>                                                            | /                             | /                                                                        | 2018 | 3         |
| PCN-161-Co(OH) <sub>2</sub> | PCN-160-imine                                            | Co(OH) <sub>2</sub>                                                          | /                             | /                                                                        | 2018 | 3         |
| PCN-161-FeCl <sub>2</sub>   | PCN-160-imine                                            | FeCl <sub>2</sub>                                                            | /                             | /                                                                        | 2018 | 3         |
| UiO-68-M                    | UiO-68-Me                                                | /                                                                            | H <sub>2</sub> L <sup>M</sup> | /                                                                        | 2018 | 4         |
| PCN-134                     | Zr-BTB                                                   | /                                                                            | H <sub>4</sub> ETTC           | /                                                                        | 2018 | 5         |
| PCN-222@MOF-5               | PCN-222                                                  | /                                                                            | /                             | Zn(NO <sub>3</sub> ) <sub>2</sub> ·6H <sub>2</sub> O, H <sub>2</sub> BDC | 2018 | 6         |
| PCN-900(Eu)-MTCPP           | PCN-900(Eu)                                              | MCl <sub>2</sub> ·4H <sub>2</sub> O (M = Zn, Fe, Ni, Co)                     | /                             | /                                                                        | 2018 | 7         |
| PCN-900(Eu)-TCPP-BPDC       | PCN-900(Eu)                                              | /                                                                            | H <sub>2</sub> BPDC           | /                                                                        | 2018 | 7         |
| PCN-161                     | PCN-160                                                  | /                                                                            | H <sub>2</sub> CBAB           | /                                                                        | 2019 | 8         |
| UiO-68                      | PCN-161                                                  | /                                                                            | H <sub>2</sub> TPDC           | /                                                                        | 2019 | 8         |
| UiO-67                      | PCN-161                                                  | /                                                                            | H <sub>2</sub> BPDC           | /                                                                        | 2019 | 8         |
| M/Zr-bimetallic MOF         | Zr-MOF                                                   | transition metal cations (M <sup>n+</sup> )                                  | /                             | /                                                                        | 2019 | 9         |
| PCN-608                     | Zr <sub>6</sub> O <sub>4</sub> (OH) <sub>4</sub> cluster | /                                                                            | /                             | TCPB-OH, benzoic acid                                                    | 2020 | 10        |
| JMOF-1                      | Zr <sub>3</sub> cluster                                  | PbI <sub>2</sub>                                                             | /                             | /                                                                        | 2021 | 11        |
| JMOF-2                      | Zr <sub>3</sub> cluster                                  | Pb(NO <sub>3</sub> ) <sub>2</sub>                                            | /                             | /                                                                        | 2021 | 11        |
| ZrMOF-Co/Ni                 | Zr <sub>3</sub> cluster                                  | CoCl <sub>2</sub> ·6H <sub>2</sub> O<br>NiCl <sub>2</sub> ·6H <sub>2</sub> O | /                             | /                                                                        | /    | This work |

## 1. Materials and Methods

All the reagents were obtained from commercial sources and used without further purification. Powder X-ray diffraction (PXRD) measurement was recorded ranging from 5 to 50° at room temperature on a Siemens D5005 diffractometer with Cu-K $\alpha$  ( $\lambda = 1.5418 \text{ \AA}$ ). The C, H, and N elemental analyses were conducted on a Perkin-Elmer 2400CHN elemental analyzer. Thermogravimetric analysis (TGA) of the samples was performed using a Perkin-Elmer TG-7 analyzer heated from room temperature to 800 °C under nitrogen at the heating rate of 10 °C·min<sup>-1</sup>. The C, H, and N elemental analyses were conducted on a Perkin-Elmer 2400CHN elemental analyzer. IR spectrum was performed in the range 4000–400 cm<sup>-1</sup> using KBr pellets on an Alpha Centaur FT/IR spectrophotometer. X-ray photoelectron spectroscopy analyses were performed on a VG ESCALABMKII spectrometer with an Al-K $\alpha$  (1486.6 eV) achromatic X-ray source. The vacuum inside the analysis chamber was maintained at  $6.2 \times 10^{-6}$  Pa during the analysis.

## 2. Synthesis

### 2.1 Synthesis of the trinuclear zirconocene-based tripodal metallo-pyridine

The synthetic process of trinuclear zirconocene-based metallo-pyridine precursor was slightly modified according to the literature<sup>[11,12]</sup>. Sodium hydroxide (210 mg) was added a suspended aqueous solution of isonicotinic acid (615 mg, 15 mL water) to dissolve isonicotinic acid completely. Then, the pH of the solution was adjusted to be 6~7 by adding 2 M dil. HCl. The clear solution was then added dropwise to a solution of Cp<sub>2</sub>ZrCl<sub>2</sub> (1.465 g) in dichloromethane (35 mL) with stirring. Subsequently, white precipitate appeared immediately. Keep stirring for more than two hours to ensure complete precipitation. After completion, the reaction mixture was filtered and washed with distilled water to obtain white solid (namely Zr<sub>3</sub> precursor) which was dried under vacuum at 60 °C.

### 2.2 Synthesis of Zr-MOF-Co and Zr-MOF-Ni

#### (1) Preparation of Zr-MOF-Co

Zr<sub>3</sub> precursor (70 mg) and CoCl<sub>2</sub>·6H<sub>2</sub>O (10 mg) were added in 1 mL DMA (N,N' - dimethylformamide). Then the mixture was sealed in a vial and heated at 70 °C for 12h, then it was gradually cooled to room temperature, resulting in pink crystals that were isolated by washing with DMA and dried under vacuum at 30 °C. The yield based on Zr<sub>3</sub> precursor is 45%. Anal. Calcd: C, 40.3; H, 4.37; N, 5.73. Found: C, 40.35; H, 4.33; N, 5.76. IR (KBr, cm<sup>-1</sup>): 3300 (br),

1627 (s), 1542 (s), 1261 (w), 607 (s).

## (2) Preparation of Zr-MOF-Ni

A 70 mg amount of Zr<sub>3</sub> precursor and NiCl<sub>2</sub>·6H<sub>2</sub>O (10 mg) was used in the same procedure as for Zr-MOF-Co. The mixture was dissolved in DMA (1 mL) and heated at 70 °C for 12h. Finally, colorless crystals were obtained by washing with DMA and dried under vacuum at 30 °C. The yield based on Zr<sub>3</sub> precursor is 40%. Anal. Calcd: C, 34.39; H, 4.43; N, 4.89. Found: C, 34.35; H, 4.47; N, 4.87. IR (KBr, cm<sup>-1</sup>): 3300 (br), 1627 (s), 1541 (s), 1411 (s), 1259 (w), 609 (s).

**Table S2.** Crystallographic Data for ZrMOF-Co and ZrMOF-Ni.

|                                    | ZrMOF-Co                                                                                           | ZrMOF-Ni                                                                                           |
|------------------------------------|----------------------------------------------------------------------------------------------------|----------------------------------------------------------------------------------------------------|
| Empirical formula                  | C <sub>82</sub> H <sub>106</sub> Cl <sub>4</sub> CoN <sub>10</sub> O <sub>29</sub> Zr <sub>6</sub> | C <sub>82</sub> H <sub>126</sub> Cl <sub>4</sub> N <sub>10</sub> NiO <sub>54</sub> Zr <sub>6</sub> |
| Formula weight                     | 2443.85                                                                                            | 2863.76                                                                                            |
| Temperature/K                      | 150.0                                                                                              | 150.0                                                                                              |
| Crystal system                     | triclinic                                                                                          | triclinic                                                                                          |
| Space group                        | P-1                                                                                                | P-1                                                                                                |
| a/Å                                | 11.3034(6)                                                                                         | 11.3213(6)                                                                                         |
| b/Å                                | 12.7188(6)                                                                                         | 12.5450(7)                                                                                         |
| c/Å                                | 21.9772(12)                                                                                        | 21.9866(13)                                                                                        |
| α/°                                | 82.236(2)                                                                                          | 82.573(2)                                                                                          |
| β/°                                | 76.045(2)                                                                                          | 76.173(2)                                                                                          |
| γ/°                                | 75.545(2)                                                                                          | 75.347(2)                                                                                          |
| Volume/Å <sup>3</sup>              | 2959.8(3)                                                                                          | 2925.7(3)                                                                                          |
| Z                                  | 1                                                                                                  | 1                                                                                                  |
| ρ <sub>calc</sub> /cm <sup>3</sup> | 1.321                                                                                              | 1.336                                                                                              |
| μ/mm <sup>-1</sup>                 | 0.795                                                                                              | 0.823                                                                                              |
| F(000)                             | 1185                                                                                               | 1186                                                                                               |
| Radiation                          | MoKα (λ = 0.71073)                                                                                 | MoKα (λ = 0.71073)                                                                                 |
| 2θ range for data collection/°     | 3.832 to 52.806                                                                                    | 3.808 to 52.83                                                                                     |
| Index ranges                       | -14 ≤ h ≤ 14,<br>-15 ≤ k ≤ 15,<br>-27 ≤ l ≤ 27                                                     | -14 ≤ h ≤ 14,<br>-15 ≤ k ≤ 15,<br>-27 ≤ l ≤ 27                                                     |
| Reflections collected              | 91794                                                                                              | 75035                                                                                              |
| Independent reflections            | 12099                                                                                              | 11964                                                                                              |
|                                    | [Rint = 0.0976, Rsigma = 0.0504]                                                                   | [Rint = 0.0824, Rsigma = 0.0488]                                                                   |
| Data/restraints/parameters         | 12099/0/580                                                                                        | 11964/0/592                                                                                        |
| Goodness-of-fit on F <sup>2</sup>  | 1.091                                                                                              | 1.066                                                                                              |
| Final R indexes [I >= 2σ (I)]      | R1 = 0.0530, wR2 = 0.1519                                                                          | R1 = 0.0480, wR2 = 0.1392                                                                          |
| Final R indexes [all data]         | R1 = 0.0727, wR2 = 0.1694                                                                          | R1 = 0.0674, wR2 = 0.1587                                                                          |

---

|                                             |            |            |
|---------------------------------------------|------------|------------|
| Largest diff. peak/hole / e Å <sup>-3</sup> | 0.82/-0.70 | 0.77/-1.02 |
|---------------------------------------------|------------|------------|

---

Disordered solvent H<sub>2</sub>O molecules were treated with the SQUEEZE program and included in molecular formula.

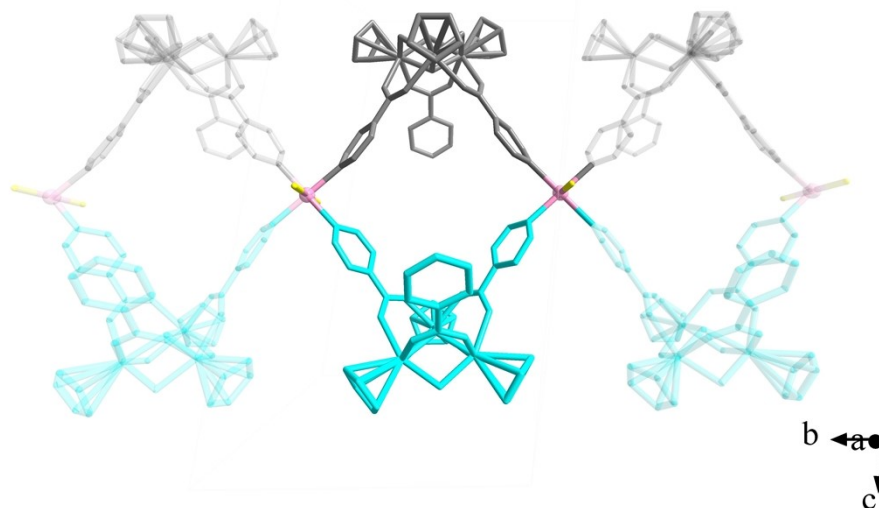

**Figure S1.** The crystal structure of ZrMOF-Co/Ni, highlighting the 2D infinite chain structure.

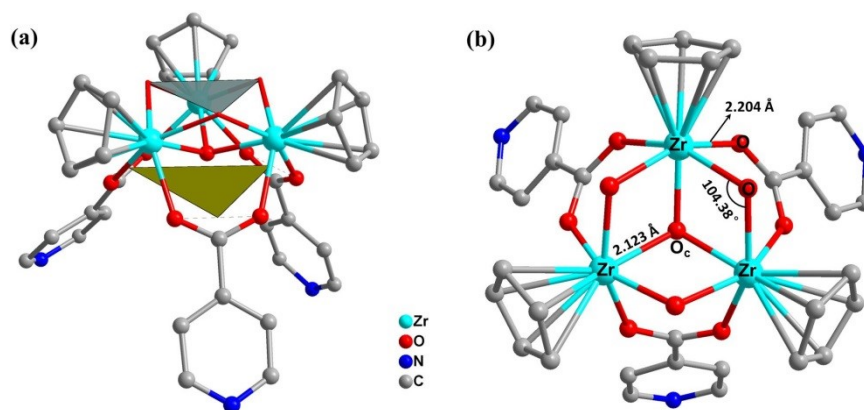

**Figure S2.** Trinuclear zirconocene-based metallo-pyridine building block. (a) highlighting the  $C_{3v}$ -symmetry; (b) the main bond angle and bond lengths.

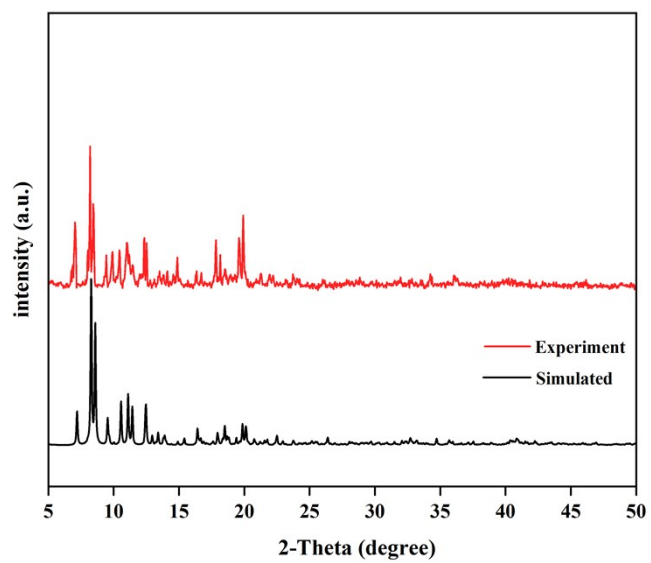

**Figure S3.** Experimental and simulated powder X-Ray diffraction patterns for ZrMOF-Co.

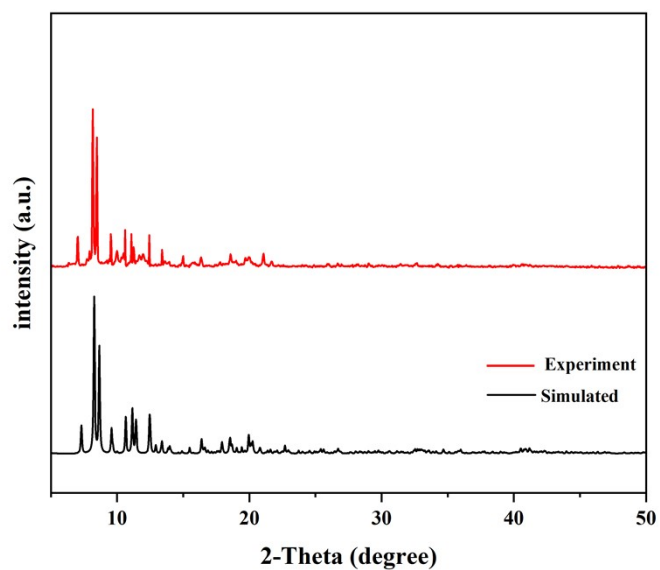

**Figure S4.** Experimental and simulated powder X-Ray diffraction patterns for ZrMOF-Ni.

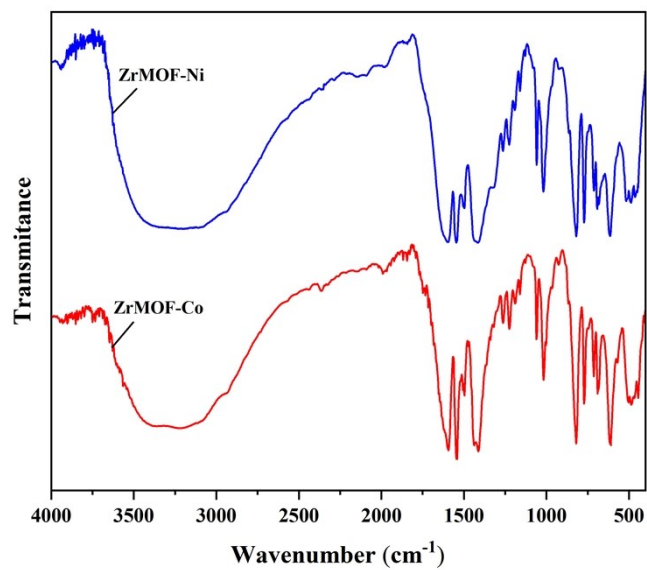

Figure S5. IR spectra of ZrMOF-Co and ZrMOF-Ni.

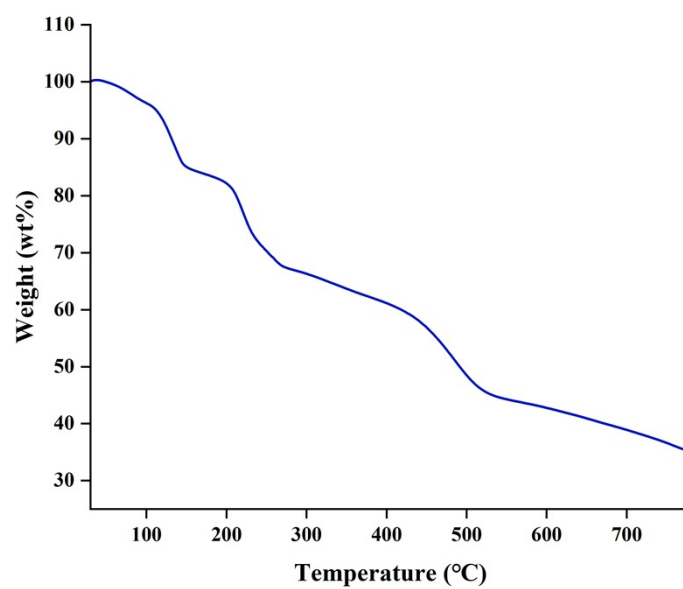

Figure S6. TGA curve of ZrMOF-Co.



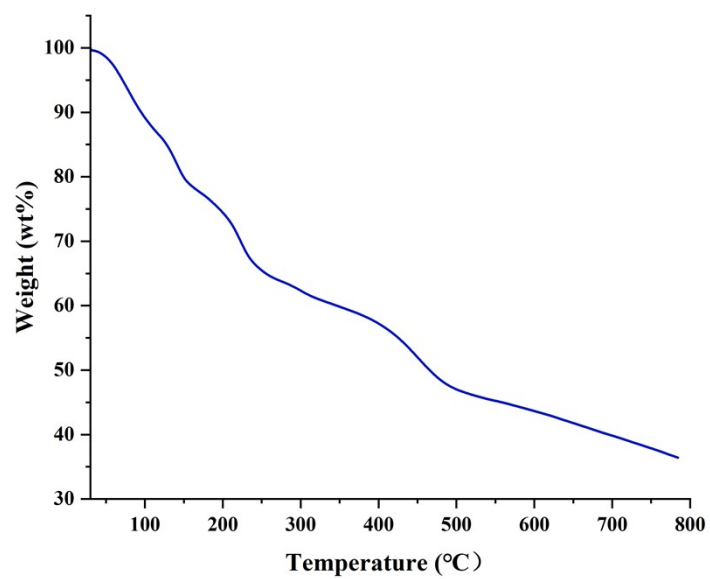

Figure S7. TGA curve of ZrMOF-Ni.

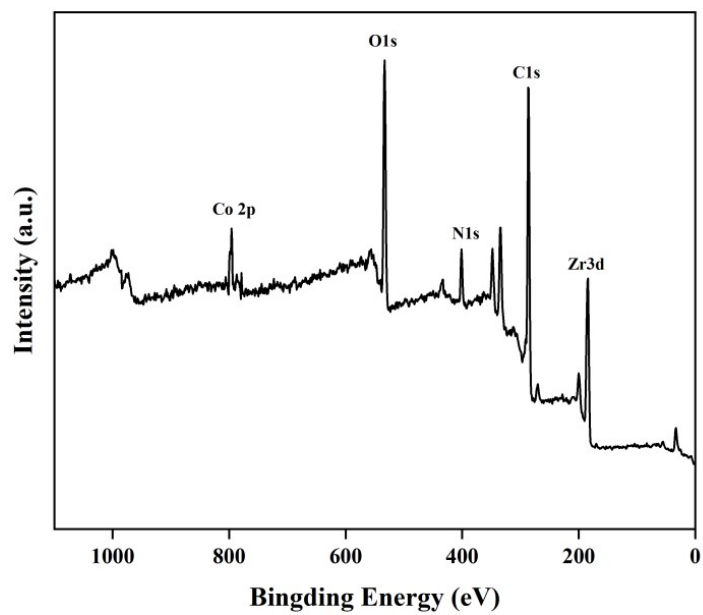

Figure S8. XPS spectra of ZrMOF-Co.

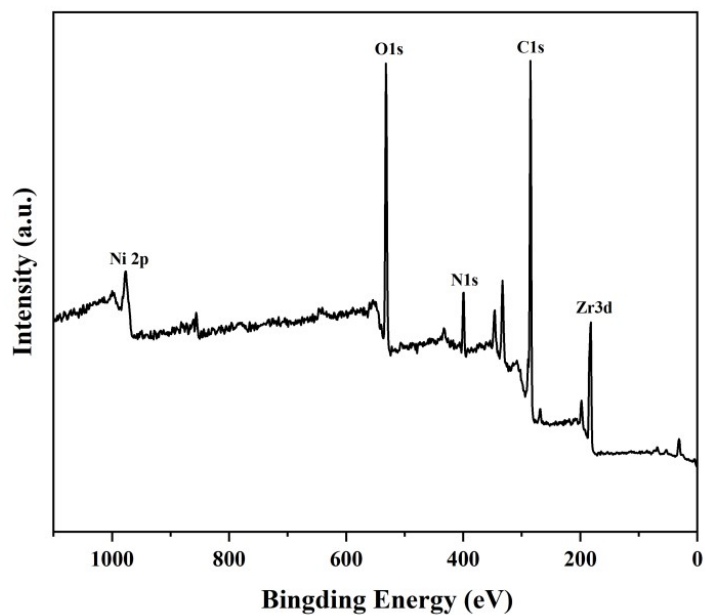

**Figure S9.** XPS spectra of ZrMOF-Ni.

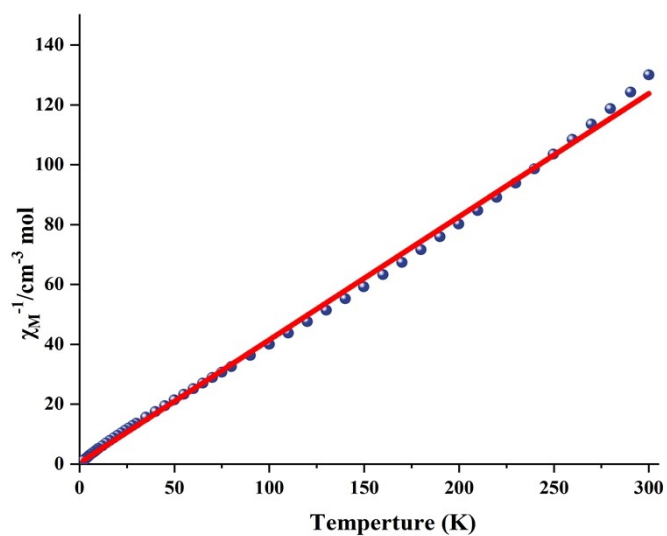

**Figure S10.** The temperature dependence of the inverse magnetic susceptibility  $\chi_M^{-1}$  for **ZrMOF-Co** between 2 and 300 K. The solid red line was generated from the best fit by the Curie-Weiss expression in the range of 0-300 K with the Curie constant  $C = 2.43 \text{ cm}^3 \text{ K mol}^{-1}$  and the Weiss constant  $\theta = -0.79 \text{ K}$ .

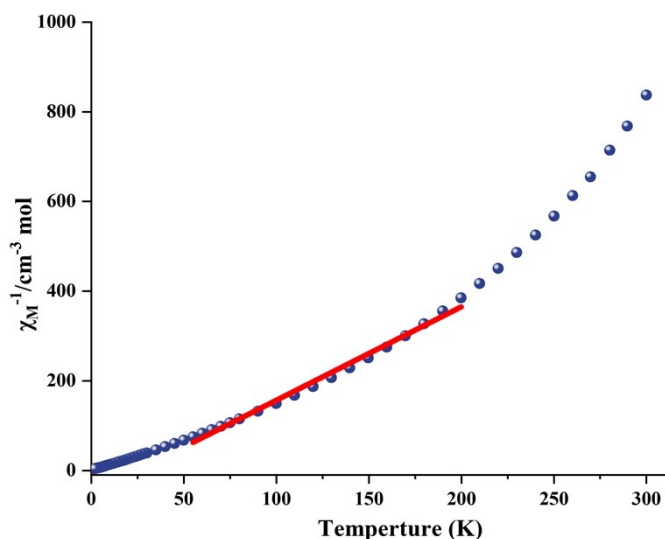

**Figure S11.** The temperature dependence of the inverse magnetic susceptibility  $\chi_M^{-1}$  for **ZrMOF-Ni** between 2 and 300 K. The solid red line was generated from the best fit by the Curie-Weiss expression in the range of 55–200 K with the Curie constant  $C = 0.48 \text{ cm}^3 \text{ K mol}^{-1}$  and the Weiss constant  $\theta = 24.84 \text{ K}$ .

## References:

- [1] V. Guillerm, S. Gross, C. Serre, T. Devic, M. Bauer and G. Férey. *Chem Commun.*, 2010, **46**, 767-769.
- [2] P. Deria, W. Bury, I. Hod, C. Kung, O. Karagiari, J. Hupp and O. Farha, *Inorg. Chem.*, 2015, **54**, 2185–2192
- [3] Yuan, J. Qin, J. Su, B. Li, J. Li, W. Chen, Hannah F. Drake, P. Zhang, D. Yuan, J. Zuo and H. Zhou, *Angew Chem Int Edit.*, 2018, **57**, 12578-12583.
- [4] C. Tan, X. Han, Z. Li, Y. Liu and Y. Cui, *J Am Chem Soc.*, 2018, **140**, 16229-16236.
- [5] C. Chen, Z. Wei, Y. Fan, P. Su, Y. Ai, Q. Qiu, K. Wu, S. Yin, M. Pan and C. Su. *Chem.*, 2018, **4**, 2658-2669.
- [6] S. Yuan, L. Li, K. Wang, S. Gregory, P. Zhang, Y. Wang and H. Zhou, *ACS Cent. Sci.*, 2018, **4**, 1719–1726.
- [7] L. Zhang, S. Yuan, L. Feng, B. Guo, J. Qin, B. Xu, C. Lollar, D. Sun and H. Zhou, *Angew Chem Int Edit*, 2018, **57**, 5095-5099.

- [8] L. Feng, S. Yuan, J. Qin, Y. Wang, A. Kirchon, D. Qiu, L. Cheng, S. T. Madrahimov and H. Zhou. *Matter*, 2019, **1**, 156-167.
- [9] S. Yuan, J. Peng, Y. Zhang and Y. Shao-Horn, *J. Phys. Chem. C.*, 2019, **123**, 28266-28274.
- [10] M. Zhao, J. Chen, B. Chen, X. Zhang, Z. Shi, Z. Liu, Q. Ma, Y. Peng, C. Tan, X. Wu and H. Zhang., *J. Am. Chem. Soc.* 2020, 142, **19**, 8953–8961
- [11] W. Gong, H. Arman, Z. Chen, Y. Xie, F. Son, H. Cui, X. Chen, Y. Shi, Y. Liu, B. Chen, O. Farha and Y. Cui, *J. Am. Chem. Soc.* 2021, **143**, 657-663.
- [12] M. Maity, P. Howlader, S. Mukherjee, *Cryst Growth Des.*, 2018, **18**, 6956-6964.
